# Supplementary material for: Development of a rapid and novel diagnostic technique for cardiac amyloidosis using Raman spectroscopy
Source: Research Square preprint supplement (doi:10.21203/rs.3.rs-6795517/v1), 2025-06-25
Supplement: Supplementary file 1 [file 4ad983e1186c476332f3559f.docx]

***Supplementary data***

**Development of a rapid and novel diagnosis technique for cardiac amyloidosis using Raman spectroscopy**

**Mizuki Yoshimoto, Shin-ichiro Yanagiya, Hiroki Takanari, Takeshi Honda,**

**Yusaku Maeda, Ryohei Sumitani, Masahiro Oura, Kimiko Sogabe,**

**Takeshi Harada, Shiro Fujii, Shingen Nakamura, Yoshimi Bando,**

**Koichi Tsuneyama, Itsuro Endo, Masahiro Abe, Ken-ichi Matsuoka,**

**Hirokazu Miki.**

**Supplementary Table 1. Number (percentage) of each amino acid in amyloid-forming regions of immunoglobulin light chains and transthyretin.**

|  | Immunoglobulin light chains  (IGLV1-44)  Total 91 amino acids | Transthyretin  (wild type)  Total 113 amino acids |
| --- | --- | --- |
| Alanine (A) | 4 (4.4) | 12 (10.6) |
| Arginine (R) | 3 (3.3) | 4 (3.5) |
| Asparagine (N) | 5 (5.5) | 2 (1.8) |
| Aspartic acid (D) | 5 (5.5) | 5 (4.4) |
| Cysteine (C) | 2 (2.2) | 0 (0) |
| Glutamine (Q) | 5 (5.5) | 0 (0) |
| Glutamic acid (E) | 2 (2.2) | 10 (8.9) |
| Glycine (G) | 12 (13.2) | 7 (6.2) |
| Histidine (H) | 0 (0) | 4 (3.5) |
| Isoleucine (I) | 3 (3.3) | 5 (4.4) |
| Leucine (L) | 4 (4.4) | 7 (6.2) |
| Lysine (K) | 2 (2.2) | 6 (5.3) |
| Methionine (M) | 0 (0) | 1 (0.9) |
| Phenylalanine (F) | 4 (4.4) | 5 (4.4) |
| Proline (P) | 5 (5.5) | 6 (5.3) |
| Serine (S) | 18 (19.8) | 10 (8.9) |
| Threonine (T) | 6 (6.6) | 10 (8.9) |
| Tryptophan (W) | 2 (2.2) | 2 (1.8) |
| Tyrosine (Y) | 4 (4.4) | 5 (4.4) |
| Valine (V) | 5 (5.5) | 12 (10.6) |

The amino acid sequence of each protein forming amyloid is based on previous studies1,2. Gray highlighted boxes indicate amino acids with Raman spectra around 1537 cm-1 3,4.

**Supplementary Figures**

**Figure S1. *Discrimination between amyloid-deposition and non-deposition regions in AL cases based on PCA. A:*** Scatter plots created by PC 1 and PC3 obtained by performing PCA of the Raman spectra of amyloid-deposition (orange circles) and non-deposition (open circles) regions in AL cases. ***B:*** ROC curve for the detection of amyloid-deposition region by PC1 and PC3 obtained by PCA of the Raman spectra of amyloid-deposition and non-deposition regions obtained from AL samples.

AL, amyloid light-chain; PCA, principal component analysis; PC principal component; ROC curve, receiver operating characteristic curve

**Figure S2. *Discrimination between amyloid-deposition and non-deposition regions in ATTR cases based on PCA. A:*** Scatter plots created by PC1 and PC10 obtained by performing PCA of the Raman spectra of amyloid-deposition (green circles) and non-deposition (open circles) regions in ATTR cases. ***B:*** ROC curve for the detection of amyloid-deposition region by PC1 and PC10 obtained by PCA of the Raman spectra of amyloid-deposition and non-deposition regions obtained from ATTR samples.

AL, amyloid light-chain; PCA, principal component analysis; PC principal component; ROC curve, receiver operating characteristic curve

**Figure S3.** ***Amino acids in amyloid-forming regions of immunoglobulin light chains and transthyretin.*** The amino acid sequence in the amyloid-forming region of each protein is based on previous studies1,2. Underlined areas indicate amino acids with Raman spectra around 1537 cm-1 3,4.

**References**

1 Radamaker, L. *et al.* Cryo-EM structure of a light chain-derived amyloid fibril from a patient with systemic AL amyloidosis. *Nat Commun* **10**, 1103, doi:10.1038/s41467-019-09032-0 (2019).

2 Schmidt, M. *et al.* Cryo-EM structure of a transthyretin-derived amyloid fibril from a patient with hereditary ATTR amyloidosis. *Nat Commun* **10**, 5008, doi:10.1038/s41467-019-13038-z (2019).

3 Zhu, G., Zhu, X., Fan, Q. & Wan, X. Raman spectra of amino acids and their aqueous solutions. *Spectrochimica Acta Part A: Molecular and Biomolecular Spectroscopy* **78**, 1187-1195, doi:<https://doi.org/10.1016/j.saa.2010.12.079> (2011).

4 Wen, C.-I., Yu, C.-N., Thirumalaivasan, N. & Hiramatsu, H. 532-nm-excited hyper-Raman spectroscopy of amino acids. *Journal of Raman Spectroscopy* **52**, 641-654, doi:<https://doi.org/10.1002/jrs.6039> (2021).
